# Supplementary material
Source: PubMed Central journal article supplement (PMC4024396)

**Skin**

**Trichrome**

---

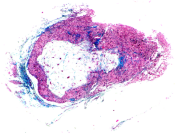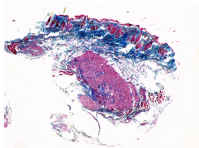

**Iba1**

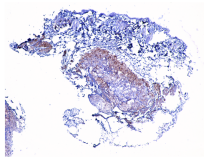

**CD45**

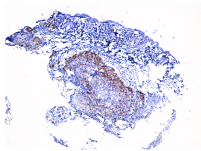

Supplement: NIHMS571716-supplement-2.pdf [file NIHMS571716-supplement-2.pdf]

Supplementary Figure 2

**A**

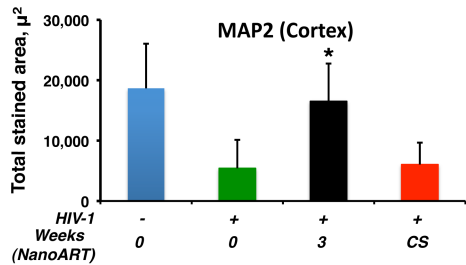

**B**

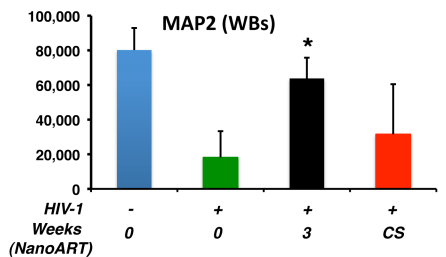

Supplement: NIHMS571716-supplement-3.pdf [file NIHMS571716-supplement-3.pdf]
